# Supplementary material
Source: publisher figshare collection journal article supplement (https://gsajournals.figshare.com/ndownloader/files/17587394)
Supplement: Supplementary file 1 [file 17587394]

## Sheet: Sheet1
BDSC stock (DGRP line)	MIDGUT MITOSIS - P.aeruginosa	BRANCHING - 5% O2	SURVIVAL - P.aeruginosa	FEMALE FECUNDITY	DEFECATION RATE - P.aeruginosa	FECAL pH - P.aeruginosa
21	19.6197		6.42	1.87
26	9.79911	5.82639	4.93	8.45	61.1667	5.60791
28	34.8912	6.1	6.85	5.83	45.9337	5.05755
31
32
38	19.6915	5.7	7.75	4.84	23.6841	4.77553
40	35.4087	6.97222	7.09	5.31	21.2268	4.97808
41
42	43.0425	5.61111	4.08	10.4	40.9708	4.96889
45	10.8951	5.73333	5.86	11.54	56.84	4.93896
48
49
57	19.3312	6.22222	6.53	7.63	51.2451	5.18655
59	18.2077	5.375	5.65	15.45	35.378	5.20279
69
73	18.8436	5.1	5.49	4.44	19.7178	4.76412
75	33.5749	4.19505			20.9764	5.10372
83	50.7437	6	4.69	7.05	19.2285	4.98907
85	47.7264	6.38889	4.81	5.4	37.4421	5.07156
88	19.6915	6	7.51	3.15	23.3181	4.67506
91	22.341	6.52632	6.4	6.99	31.9018	5.45827
93	8.35159	6.22222	7.26	9.06	53.5547	5.14363
100
101	21.7051	5.45			59.285	5.14613
105	0.403067	5.66667			26.4652	5.14858
109	21.4931	6.28148	9.39	1.72	28.2762	4.81377
129	22.5529	5.65	8.07	1.6	31.115	4.87465
136	79.8883	6	5.87	3.29	27.5559	5.00254
138	9.94129	6.29737	7.7	3.54	14.6533	5.13104
142	41.0995	5.33333	5.58	2.01	16.1577	5.23556
149	107.019	5.75439	5.4	4.71	40.628	5.17883
153	42.1593	5.64286			33.3141	5.05768
158	40.8352	6.63947	4.68	4.89	20.6526	4.98992
161
176	23.1922	6.3			28.1634	4.91301
177	29.181	5.82353	4.3	9.53	10.9316	4.551
181	6.63814	5.7	6.26	7.93	19.8723	5.20453
189	76.5635	5.23333	10.42	3.52	50.7689	5.14427
195	71.8848	5.94737	8.45	3.87	12.8512	4.61102
208	29.2814	5.65	5.41	7.12	33.5509	5.2278
217	25.0978	5.15	6.21	8	22.4818	4.70178
223
227
228	61.6512	5.45	5.65	6.74	36.2057	4.96471
229	13.8228			4.1	50.6023	5.02574
233
235	43.7364	5.3	8.96	10.9	32.5641	4.81516
237	41.6008	6.15	7.89	3.52	41.4368	4.87916
239	19.3132	5.4	10.18	5.74	48.5198	4.93748
256
280	20.9465	5.94737	6.41	9.52	23.7797	4.857
287
301	30.0375	4.92105	7.13	5.35	26.7564	5.27469
303
304	37.8286		7.13	4.05	20.3819	4.86975
306	58.4069	5.44444	7.46	6.56	13.7483	4.548
307	64.6688	3.96992	5.73	7.6	24.3412	4.88204
309	63.2079	6	10.56	4.89	41.6815	4.86129
310
313	19.731	6.11111	5.16	1.45
315	20.9225	7.11111			39.3148	5.23106
317	30.9674	5.82353	11.11	5.38	27.7007	4.83373
318	27.6498	5.95	6.78	7.99	23.9526	4.90356
319
320			5.79
321	22.8482	5.61111	7.53	7.39	42.8385	4.89388
324	19.1995	6.11765	5.21	4.5	53.3942	5.42334
325
332	24.5023	6.83235	6.94	3.73	60.4743	5.23404
335	38.8844	5.75	9.53	7.49	33.4962	4.6835
336		6.10526
338	34.6253	6.47059	11.3	5.22	12.3157	4.94168
340	10.8064	6.10526	6.05	6.47	38.5717	5.26751
348
350	31.2226	5.8	5.49	6.84	62.1669	5.464
352		6.01667	6.36	6.92	56.0047	4.96508
354
355
356	26.9692	5.83333	7.82	1.63	64.2862	4.74259
357	59.1238	4.82353			28.0963	5.02223
358	36.4035	4.78947			35.6777	4.96864
359	22.2869	5.55428	6.15	5.79	43.1054	4.92395
360	34.734	6.23065	6.13	7.26	36.0975	5.06998
361	16.4137	5.29412	8.47	7.75	66.1047	4.91558
362
365	72.9277	6.26316	6.86	5.44	38.0383	4.85879
367		4.11765	7.28	4.95
370	59.5038	5.31579	7.12	4.64	13.0931	4.79744
371	24.9805	5.6	7.86	7.27	29.7008	4.85403
373	25.489	5.05556	5.87	2.75
374	14.0089				60.2722	5.26392
375	19.2247	6.39342	6.62	8.92	32.2538	4.88204
377	36.4582	6.14286	8.56	2.48	32.7893	5.03636
379	35.9354	6.85691	9.77	4.59	10.9952	4.58866
380	11.1642	5.3	7.35	6.28	33.5546	5.08733
381	18.6652	5	5.58	3.31	24.6108	5.27574
382	21.0594	5.83333	8.28	2.95	13.2512	4.80258
383	44.5155	5.85			33.7348	4.93514
385		5.85
386	53.5069	4.36923	7.03	12.53	23.705	4.96515
390
391	22.4545		5.99	3.64	50.6843	5.06924
392	49.4199	6.38	12.84	15.63	58.3851	5.09789
395
397
399	59.4178	4.5	5.99	8.08	24.406	5.0621
405	50.3469	4.54118	5.98	2.74	68.8689	5.14084
406
409	34.3692	5.6	5.52	2.09	8.51358	4.81379
426	85.0644	6	5.8	4.17	46.8865	5.0362
427	47.9695	5.25	4.71	5.01	40.1516	5.20951
437	27.8094	5.94118	8.13	5.46	24.8333	4.80709
439	33.1298	6.5	6.37	7.13	68.0615	5.33683
440	27.3676	6.27778	9.61	7.36	32.997	5.15881
441	23.1609	4.75735	7.71	5.07	14.2133	4.9912
443	34.9621	5.8	6.69	3.28	53.7344	4.71289
461	16.1925	5.44444	5.49	4.22	16.5197	4.86805
486	12.1449	4.65789	7.02	4.24	44.3651	5.03324
491	25.1411	5.5	6.11	5.56	60.057	5.14737
492
502	26.3079	4.67368	7.32	8.11	26.2101	4.90567
505
508	32.8587	5.5	4.96	2.7
509	16.3151	5.73684	10.07	4.85	9.75737	4.67394
513			8.69	6.51	64.3311	5.09526
517	14.4109	6.8	6.56	4.54	37.2082	5.21321
528
530	36.6166		5.65	6.6	52.2299	5.3285
531		4.44167
535	20.1423	4.48246	6.94	7.57	23.8174	4.83908
551
555	5.01232	6.05	8.77	5.78	39.5405	4.65679
559
563	30.6269	5.4	6.56	6.62	48.6603	5.1503
566
584	39.7827	5.47368	6.87	5.62	34.066	5.06471
589	27.1498	5.16184	10.68	5.54	17.7751	5.07228
595	36.8877	6.05263	7.1	3.05	37.6886	5.13699
596
627
630
634
639	20.3609	6.77047	4.9	1.45	44.4124	4.93263
642	48.4291	5.09398	8.02	0.55	18.1302	4.69238
646	12.052	5.8			36.5789	4.86574
703	16.3346	5.8	6.26	8.89	39.1429	5.12289
705	36.2608	5.93333	7.7	2.77	24.6813	5.00277
707	22.9624	5.88889	7.67	3.38	16.0235	4.94677
712	33.5923		6.85	6.64	66.7848	5.23612
714		6.97368	6.34	3.73	13.4319	5.29431
716	19.8613	5.22222	6.68	7.82	55.4676	5.0719
721	43.7235	7.21053	7.59	8.8	22.3966	4.706
727		5.8
730
732	3.48363	5.27778	9.55	8.26	20.893	5.13362
737	18.4111	6.11111	8.19	6.59	16.7603	4.4398
738	28.9453	6.1	6.18	6.42	36.8319	4.799
748	20.0142	6.0625	6.94	5.48	54.0733	5.28328
757
761
765	73.17		5.25	6.65	37.7523	5.04342
774	48.4708	6.41667	5.71	10.17
776	54.5026	6.11111	6.96	4.27	24.5259	4.91044
783	24.5714	5.72222	5.22	3.39	25.6492	5.0015
786	16.9021	4.275	7.35	5.16	39.3362	4.83475
787	40.8762	6.10526	6.62	6.44	30.0998	4.51485
790		5.35	6.16	1.2	27.5381	5.01506
796	29.7032	6.15	8.77	11.61	24.4901	5.08246
799	19.7549				45.6191	4.83374
801	9.84729	5.05	5.27	7.55	48.4817	4.91021
802	27.2117	5.65	5.42	7.32	19.7062	4.64676
804
805	29.4918	6.86223	7.68	6.63	53.1676	5.22752
808	38.8388	4.42105	12.69	5.68	52.3827	4.87758
810	33.018	6.5	6.24	3.28	29.6285	5.10491
812
818	25.5236	6.6			26.8188	5.14868
819	35.0165	4.68382	4.91	3.16	12.6003	4.98498
820	14.1844	5.66667			74.7904	5.13226
821	14.3958	5.47059	5.63	5.07	37.0015	5.1183
822	17.3939	5.10789	7.88	5.95	58.6697	4.67888
832	28.4925	5.5	4.96	3.15	54.098	4.9556
837	27.4261	5.36842	7.73	1.61	9.33111	4.96131
843	69.605	6.07222	7.07	6.67	28.6135	4.93757
849	50.0414	5.9	6.2	3.46	44.8267	4.86574
850	23.6747	5.3125	4.46	6.65	25.0363	5.00698
852	8.40939	6.31579	13.25	5.97	32.8239	5.223
853	13.899	4.42368	7.25	8.51	55.6047	5.34776
855	73.1141	6.31579	7.9	4.03	41.439	5.01949
857
859	8.00174	5.15789	9.69	9.66	51.1988	5.17363
861	31.8123	6.45	6.14	7.11	47.899	4.94495
879	26.3348	6.24458	5.63	2.52	18.8993	5.01253
882	4.76786	6.05	5.67	8.35	16.4527	4.86875
884	34.791	6.7
887
890	18.4496	6.95	6.59	5.4	29.0351	5.36943
892	45.1539	6.47368	5.79	8.31	37.2767	5.11769
894
897	38.9092	5.3	8.85	5.83	38.1466	4.85086
900	30.1022	5.42105	7.25	5.03	13.271	5.01181
907	32.0224	5.63158	5.53	8.74	20.2333	4.8927
908	43.9802	7.19378	9.5	6.97	12.8285	4.78019
911	22.3741	5.23529	5.16	8.92	13.8046	5.47142
913	14.7956	5.45	7.39	10.96	37.4794	4.53044
